# Supplementary material
Source: PubMed Central journal article supplement (PMC8319090)
Supplement: NIHMS1703083-supplement-Supplemental_file_1.pdf [file NIHMS1703083-supplement-Supplemental_file_1.pdf]

## Supplemental digital content

Figure S1 A,B. The association between CD4 and K/T (top), and CD4 nadir and K/T (bottom)

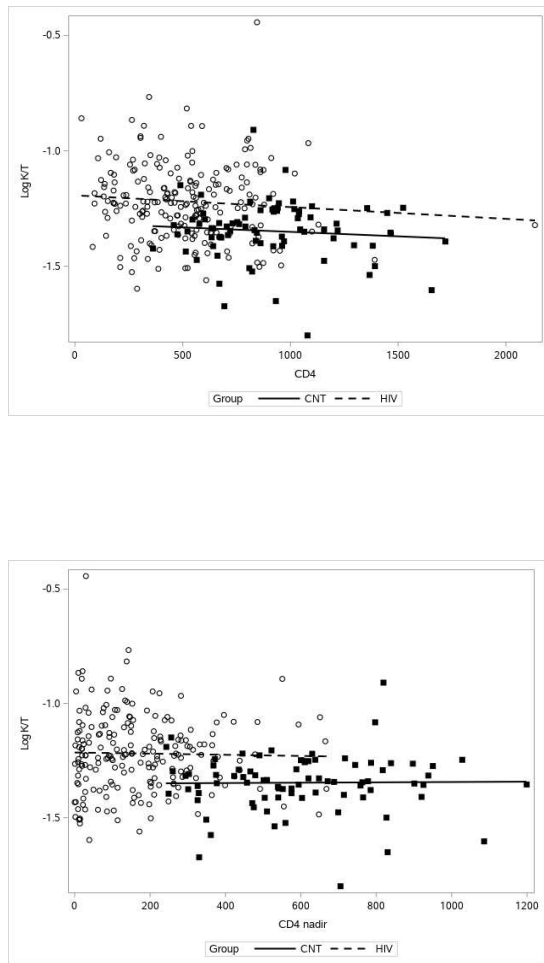

Figure S1 A,B. There was not a significant association between K/T and CD4 ( $p=0.16$ ) or CD4 nadir ( $p=0.84$ ). K= kynurenine, T=tryptophan
