# Supplementary material
Source: PubMed Central journal article supplement (PMC8319090)
Supplement: NIHMS1703083-supplement-Supplemental_file_2.pdf [file NIHMS1703083-supplement-Supplemental_file_2.pdf]

## Supplemental digital content

Figure S2. Association between Neopterin and K/T

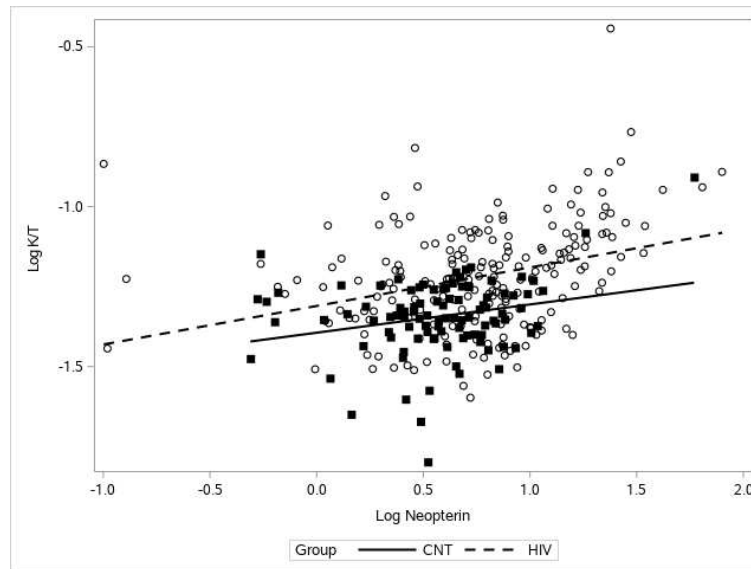Figure S2: As neopterin increases K/T increases for all subjects ( $p < 0.0001$ ). K= kynurenine, T=tryptophan
